# Supplementary material
Source: HighWire-hosted journal article supplement (https://jnm.snmjournals.org/highwire/filestream/94262/field_highwire_adjunct_files/0/83386_Supplemental_Data.pdf)
Supplement: 83386_Supplemental_Data.pdf [file 83386_Supplemental_Data.pdf]

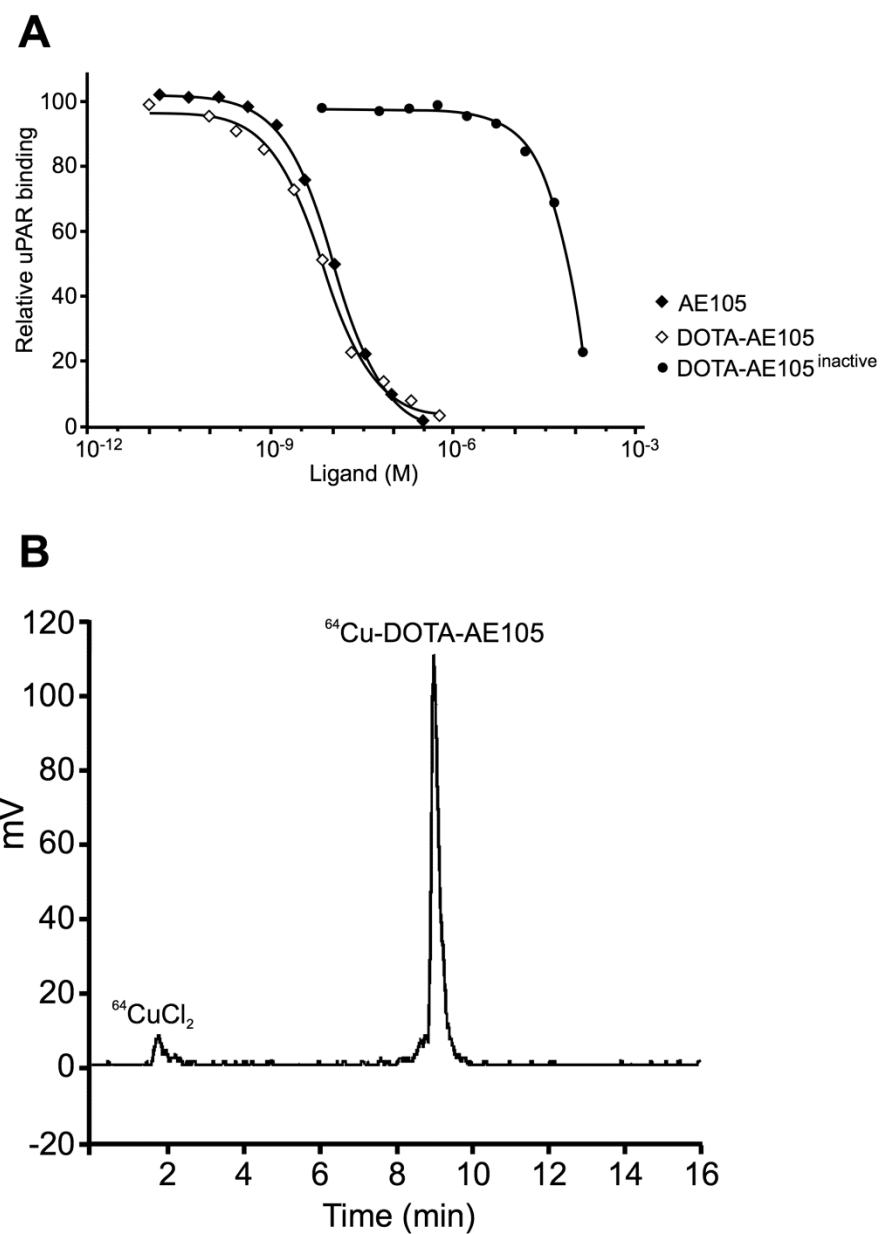

### Supplemental Figure 1

(A) No effect on affinity towards uPAR of DOTA-conjugation was found whereas the control peptide (DOTA-AE105<sup>inactive</sup>) as expected displayed a very low affinity. (B) A representative HPLC chromatogram of the final product after purification of <sup>64</sup>Cu-DOTA-AE105.

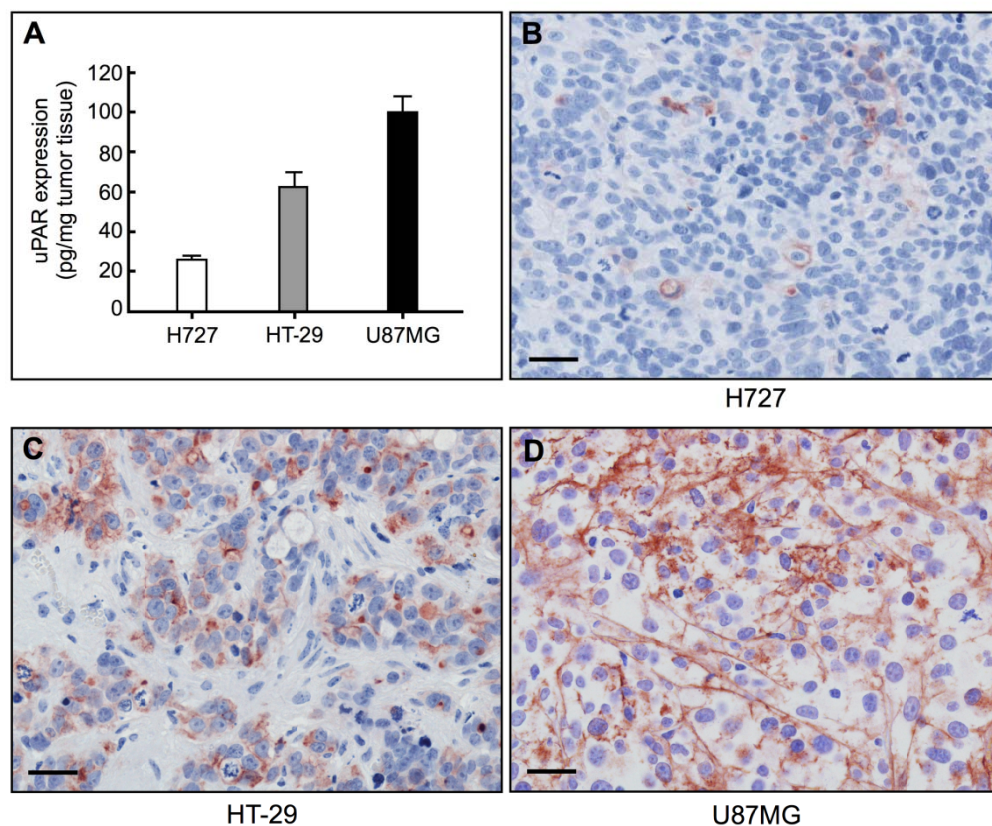

### Supplemental Figure 2

(A) uPAR expression levels in subcutaneously xenotransplanted U87MG human glioblastoma, HT-29 human colorectal carcinoma and H727 human lung carcinoid as assessed by ELISA determination in lysates of resected tumor tissue. Results are shown as mean  $\pm$  SEM (n=6 tumors/group). (B–D) Immunohistological detection of human uPAR in xenotransplanted H727 (B), HT-29 (C), and U87MG (D) tumors. Bar = 10  $\mu$ m.
